# Supplementary material for: Chicory Extracts and Sesquiterpene Lactones Show Potent Activity against Bacterial and Fungal Pathogens
Source: MDPI journal article supplement (doi:10.3390/ph14090941), 2021-09-20
Supplement: s1 [file s1]

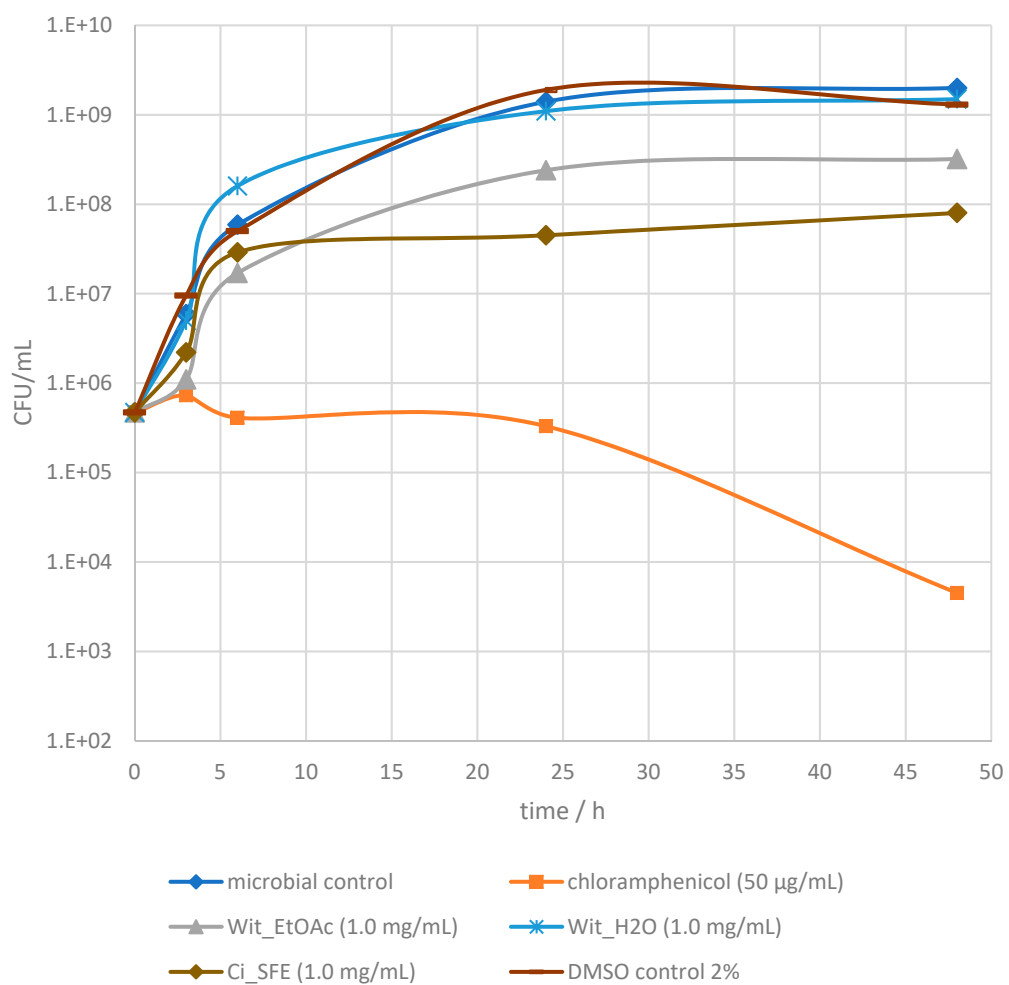

**Supplementary Figure S2.** Antimicrobial activity of Wit\_EtOAc, Wit\_H<sub>2</sub>O and Ci\_SFE against *Staphylococcus aureus* VTT E-70045 at 1 mg/mL concentration in liquid cultures during 48 h of incubation.
